# Supplementary material for: [11]Cycloparaphenylene incorporating a redox-active dithiafulvene moiety provides access to a carbon nanohoop with an unpaired electron along the core
Source: Royal Society of Chemistry journal article supplement (doi:10.1039/d5cc06226h), 2026-01-01
Supplement: d5cc06226h1.zip [file chemcomm_si_jan9.pdf › chemcomm_si_jan9.pdf]

**Supplementary Information:**  
**[11]Cycloparaphenylene incorporating a redox-  
active dithiafulvene moiety provides access to a  
carbon nanohoop with an unpaired electron along  
the core**

**Table of Contents**

|                                          |    |
|------------------------------------------|----|
| 1. General Methods .....                 | 2  |
| UV-Vis-NIR Absorption Spectroscopy ..... | 2  |
| Electrochemistry .....                   | 2  |
| ESR Spectroscopy .....                   | 2  |
| 2. Synthetic Protocols .....             | 3  |
| 3. NMR Spectra .....                     | 4  |
| 4. Electrochemistry .....                | 7  |
| 5. HRMS Spectra .....                    | 10 |
| 6. Computational .....                   | 12 |
| 7. ESR spectrum of F-DTF .....           | 13 |
| 8. References.....                       | 13 |

## 1. General Methods

Unless otherwise stated, commercially available materials were used without purification. Flash column chromatography was performed using silica gel (Silica gel 60 (43–60  $\mu\text{m}$ ) purchased from VWR). NMR spectra were recorded on a Bruker instrument equipped with an observe cryoprobe or a cryo-inverse probe instrument (Novo Nordisk Foundation NMR facility at the Department of Chemistry, University of Copenhagen (Grant: NNF21OC0067315)) at 500 MHz and 126 MHz for  $^1\text{H}$  and  $^{13}\text{C}$  NMR spectroscopy, respectively. Deuterated dichloromethane ( $\text{CD}_2\text{Cl}_2$ ,  $^1\text{H}$  = 5.32 ppm,  $^{13}\text{C}$  = 53.84 ppm) was used as solvent and internal reference. Chemical shift values are referenced to the ppm scale; coupling constants are expressed in Hertz (Hz); and apparent multiplicities are reported as s (singlet), d (doublet), t (triplet), q (quartet), dd (doublet of doublets), td (triplet of doublets) or m (multiplet). HRMS analysis was performed on a Bruker Solarix XR MALDI-FT-ICR instrument with dithranol as a matrix. All solvents used were HPLC grade from VWR and used without further purification. Anhydrous tetrahydrofuran (THF) was obtained after drying directly from the bottle over molecular sieves (3 Å). All water used was deionized. Compound **F[11]CPP** was prepared according to literature procedures.<sup>[1]</sup>

### UV-Vis-NIR Absorption Spectroscopy

All measurements were carried out in 10-mm quartz cuvettes from Hellma. UV-Vis absorption measurements were carried out on a Varian Cary 50 UV-vis spectrophotometer (200–1100 nm). UV-Vis-NIR absorption measurements were carried out on an Agilent Cary 5000 UV-Vis-NIR spectrophotometer (200–3300 nm). A background of pure solvent was subtracted.

### Electrochemistry

Cyclic voltammograms (CV) and differential pulse voltammograms (DPV) were obtained using an Autolab PGSTAT12 instrument and Nova 1.11 software with a scan rate of 0.1 V/s for the CVs. A silver wire was used as the reference electrode, a Pt wire was used as the counter electrode, and a platinum disk electrode (diameter = 1.6 mm) was used as the working electrode. The reference electrode was separated from the solution containing the substrate by a ceramic frit. Measured potentials were referenced to the ferrocene/ferrocenium ( $\text{Fc}/\text{Fc}^+$ ) redox couple, measured before and after the experiment for a 1.0 mM solution of Fc. A 0.1-M concentration of *n*- $\text{Bu}_4\text{NPF}_6$  was used as supporting electrolyte. All solutions were purged with argon prior to measurements. All compounds were measured at 0.5 mM concentrations in  $\text{CH}_2\text{Cl}_2$ .

### ESR Spectroscopy

The sample was prepared by addition of 0.9 molar equivalents of 'magic blue' (**MB**, tris(4-bromophenyl)ammonium hexachloroantimonate) from a solution in anhydrous  $\text{CD}_2\text{Cl}_2$  to a solution of **DTF[11]CPP** in  $\text{CD}_2\text{Cl}_2$  under  $\text{N}_2$ , after which  $\approx 25\ \mu\text{L}$  of the resulting red solution was added to a flame-dried EPR tube under  $\text{N}_2$ . The EPR tube was degassed three times using freeze-pump-thaw ( $\text{N}_2$ ) and subsequently sealed. ESR measurements were performed at X-band ( $\sim 9.6\ \text{GHz}$ ) using a Bruker Elexsys E580 spectrometer equipped with a Flexline MD5 dielectric resonator. Measurements were performed at room temperature using a 100 kHz modulation frequency, 0.1 G modulation amplitude, and a power of 0.15 mW. The measurements were performed at the Novo Nordisk Foundation Copenhagen Pulse EPR Facility.

For compound **F-DTF**: The sample was prepared by addition of approximately 1 molar equivalent of 'magic blue' (**MB**, tris(4-bromophenyl)ammoniumyl hexachloroantimonate) from a freshly prepared solution in degassed anh. CD<sub>2</sub>Cl<sub>2</sub> to a solution of **F-DTF** in degassed anh. CD<sub>2</sub>Cl<sub>2</sub>, after which the resulting red solution was added to a capillary tube (with one end capped), inserted into a EPR tube. ESR measurements were performed at X-band (~9.6 GHz) using a Bruker Elexsys spectrometer equipped with a dual mode resonator. Measurements were performed at room temperature using a 100 kHz modulation frequency, 1.0 G modulation amplitude, and a power of 20 mW. Measurements at 0.1 G modulation amplitude did not reveal any hyperfine coupling.

## 2. Synthetic Protocols

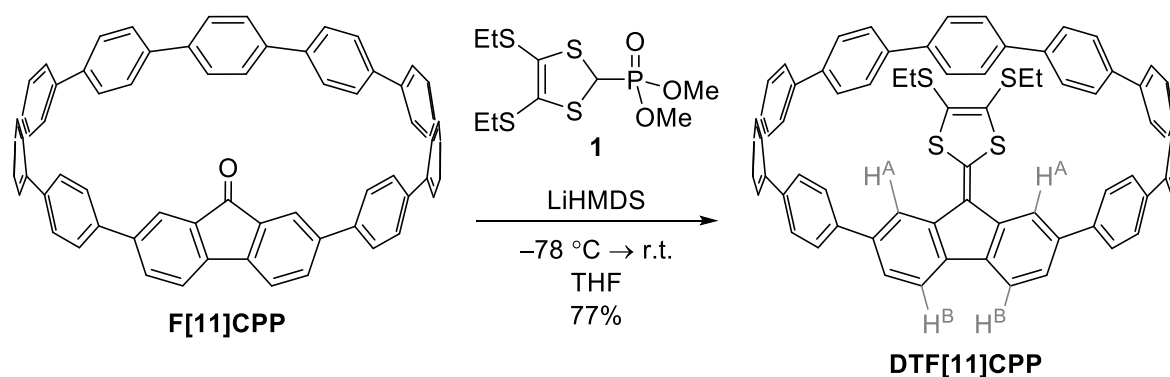

To a 50-mL flame-dried Schlenk-flask equipped with a magnetic stirrer bar was added phosphonate **1** (38 mg, 80  $\mu\text{mol}$ , 3.0 equiv.); the flask was evacuated and backfilled with N<sub>2</sub> three times before anh. THF (10 mL) was added. The flask was cooled in a dry ice/acetone bath for 1 h before LiHMDS (0.12 mL, 0.12 mmol, 4.5 equiv.), from a 1.0 M solution in THF) was added dropwise via syringe, and the flask was left to stir for 1.5 h. In a separate 50-mL flame-dried Schlenk flask equipped with a magnetic stirrer bar was added ketone **F[11]CPP** (23 mg, 27  $\mu\text{mol}$ ), and the flask was evacuated and backfilled with N<sub>2</sub> three times before anh. THF (10 mL) was added. The flask was cooled in a dry ice/acetone bath for 30 min, before the deprotonated phosphonate **1** was cannulated into the flask over the course of approximately 2 min. The mixture was stirred in the cooling bath  $-78\text{ }^{\circ}\text{C}$  and was allowed to reach room temperature overnight. The resulting clear yellow solution was quenched with sat. aq. NH<sub>4</sub>Cl (1 mL) and H<sub>2</sub>O (1 mL), and the organic volatiles were removed *in vacuo*. The mixture was extracted with CH<sub>2</sub>Cl<sub>2</sub> (2  $\times$  25 mL), and the organic phase was dried over MgSO<sub>4</sub>, filtered and the volatiles removed *in vacuo*. The crude mixture was purified by a short column (SiO<sub>2</sub>, CH<sub>2</sub>Cl<sub>2</sub>:heptane 3:1), followed by precipitation from CH<sub>2</sub>Cl<sub>2</sub> by addition of pentane, which yielded **DTF[11]CPP** as a yellow powder (22 mg, 21  $\mu\text{mol}$ , 77% yield).

<sup>1</sup>H NMR (500 MHz, CD<sub>2</sub>Cl<sub>2</sub>)  $\delta$  7.77 (d,  $J$  = 8.1 Hz, 2H, **H<sup>B</sup>**), 7.70–7.58 (m, 38H), 7.51 (d,  $J$  = 1.5 Hz, 2H, **H<sup>A</sup>**), 2.98 (q,  $J$  = 7.3 Hz, 4H, -SCH<sub>2</sub>CH<sub>3</sub>), 1.36 (t,  $J$  = 7.3 Hz, 6H, -SCH<sub>2</sub>CH<sub>3</sub>).

<sup>13</sup>C NMR (126 MHz, CD<sub>2</sub>Cl<sub>2</sub>)  $\delta$  140.77, 139.76, 139.61, 139.01, 138.95, 138.80, 138.67, 138.42, 138.36, 136.92, 136.48, 129.07, 128.29, 127.88, 127.84, 127.74, 127.71, 127.65, 127.62, 127.51, 127.48, 125.44, 123.24, 121.74, 121.12, 31.28, 15.30. Two sp<sup>2</sup>-C signals are missing, presumably due to overlap.

HRMS (MALDI<sup>+</sup>, FTICR)  $m/z$  = 1068.2941 [M+H]<sup>+</sup>, calcd. for C<sub>74</sub>H<sub>52</sub>S<sub>4</sub><sup>+</sup>  $m/z$  = 1068.2946

### 3. NMR Spectra

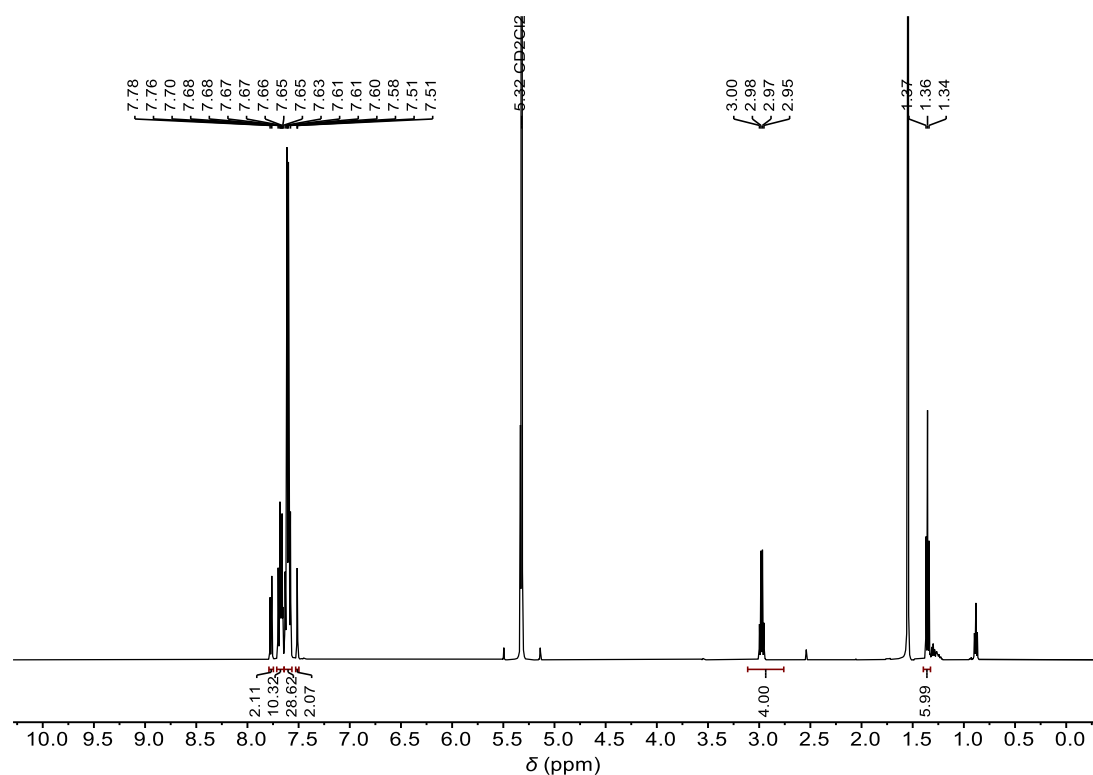

**Figure S1.**  $^1\text{H}$  NMR (500 MHz) spectrum of compound **DTF[11]CPP** in  $\text{CD}_2\text{Cl}_2$ . Residual solvent (pentane) signals at 1.30 and 0.88 ppm.

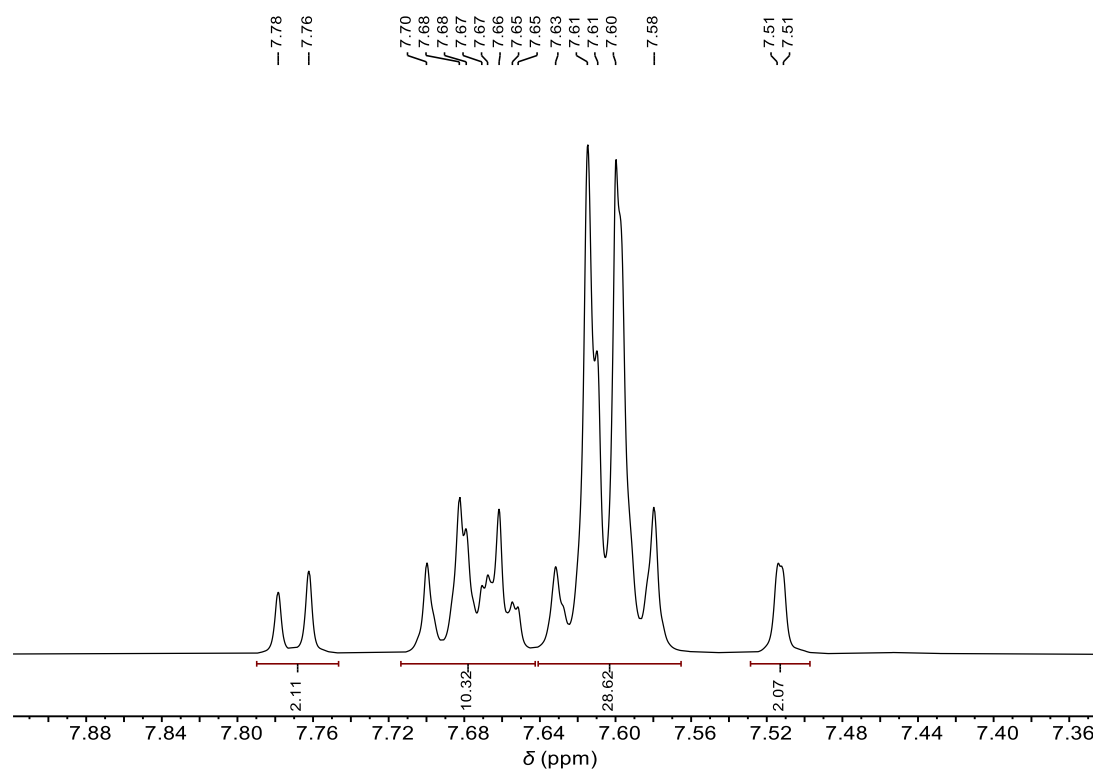

**Figure S2.**  $^1\text{H}$  NMR (500 MHz) spectrum of compound **DTF[11]CPP** in  $\text{CD}_2\text{Cl}_2$ ; selected region.

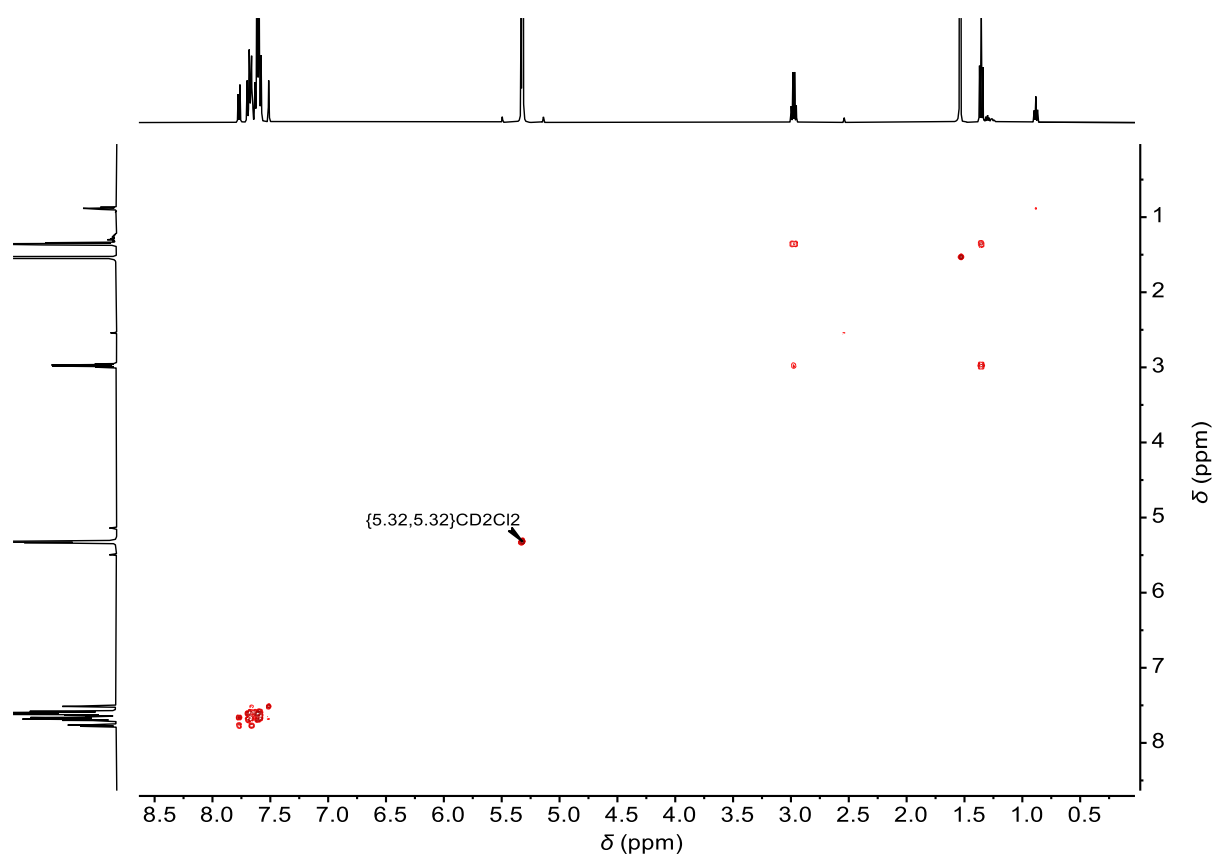

**Figure S3.**  $^1\text{H}$ - $^1\text{H}$  COSY NMR (500 MHz) spectrum of compound **DTF[11]CPP** in  $\text{CD}_2\text{Cl}_2$ .

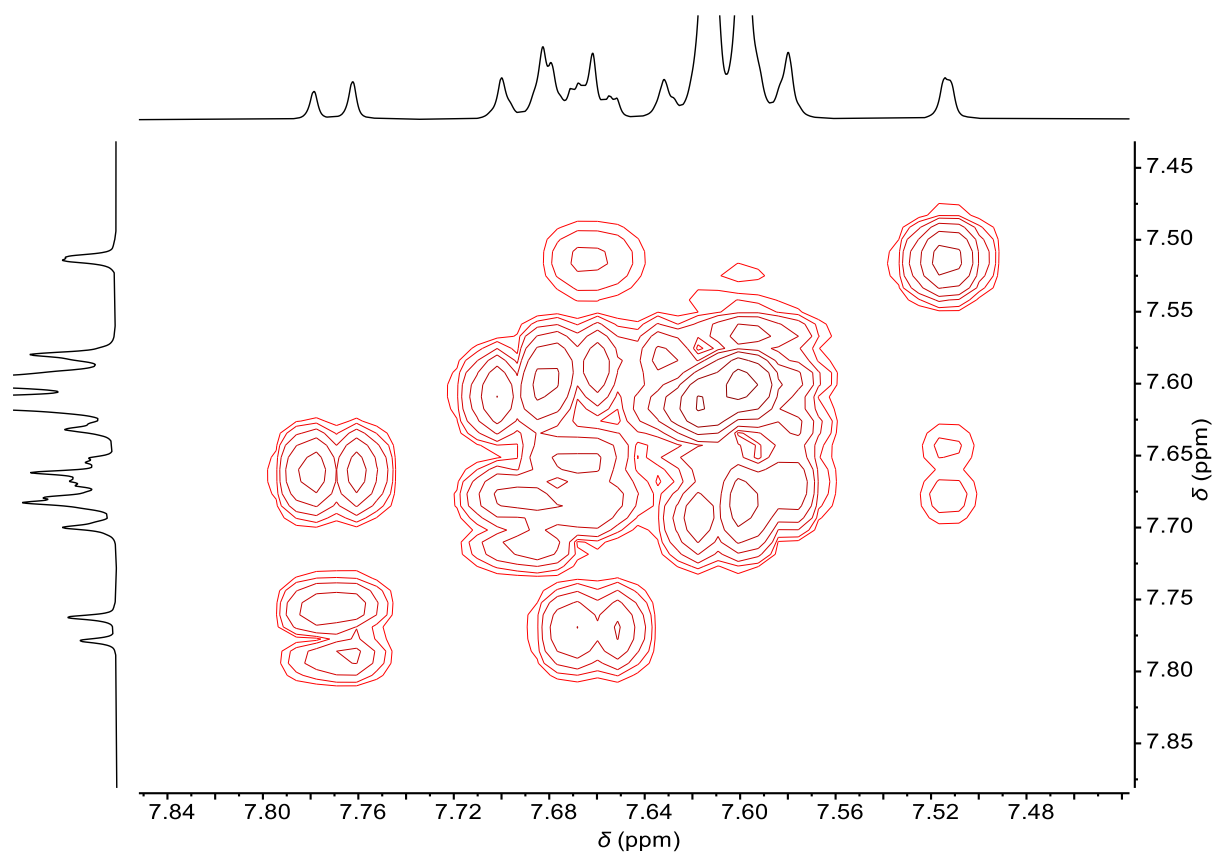

**Figure S4.**  $^1\text{H}$ - $^1\text{H}$  COSY NMR (500 MHz) spectrum of compound **DTF[11]CPP** in  $\text{CD}_2\text{Cl}_2$ ; selected region.

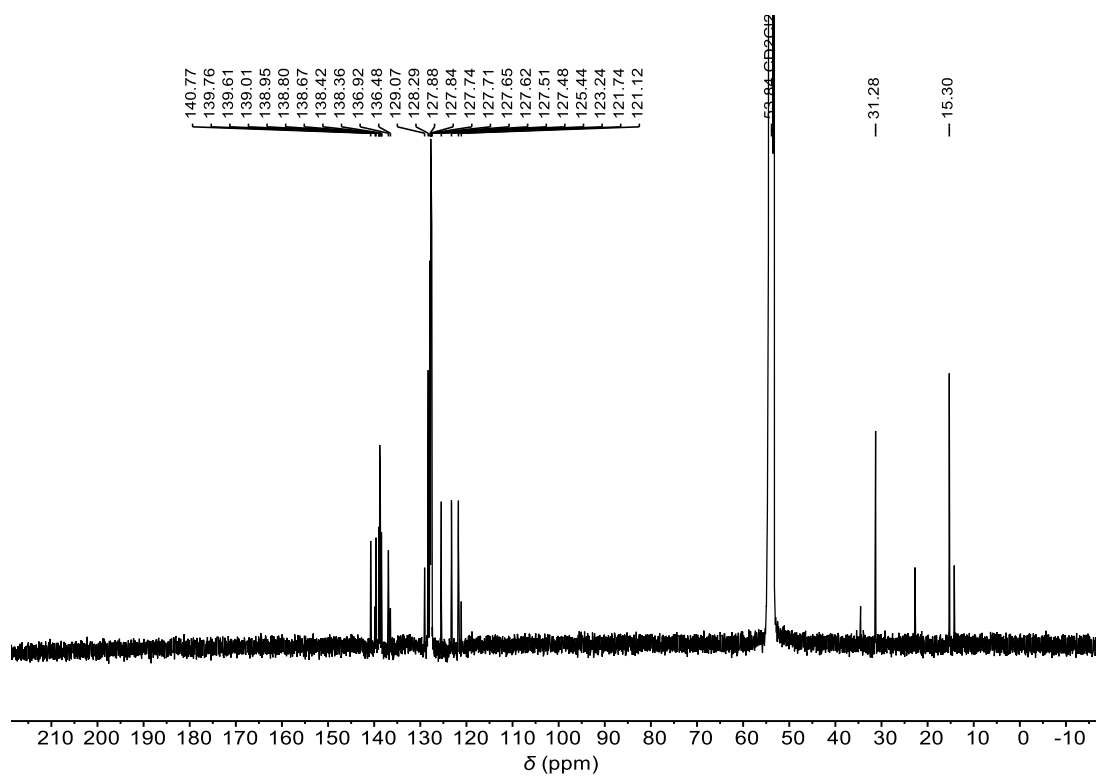

**Figure S5.**  $^{13}\text{C}$  NMR (126 MHz) of compound **DTF[11]CPP** in  $\text{CD}_2\text{Cl}_2$ . Residual solvent (pentane) signals at 34.54, 22.75 and 14.22 ppm.

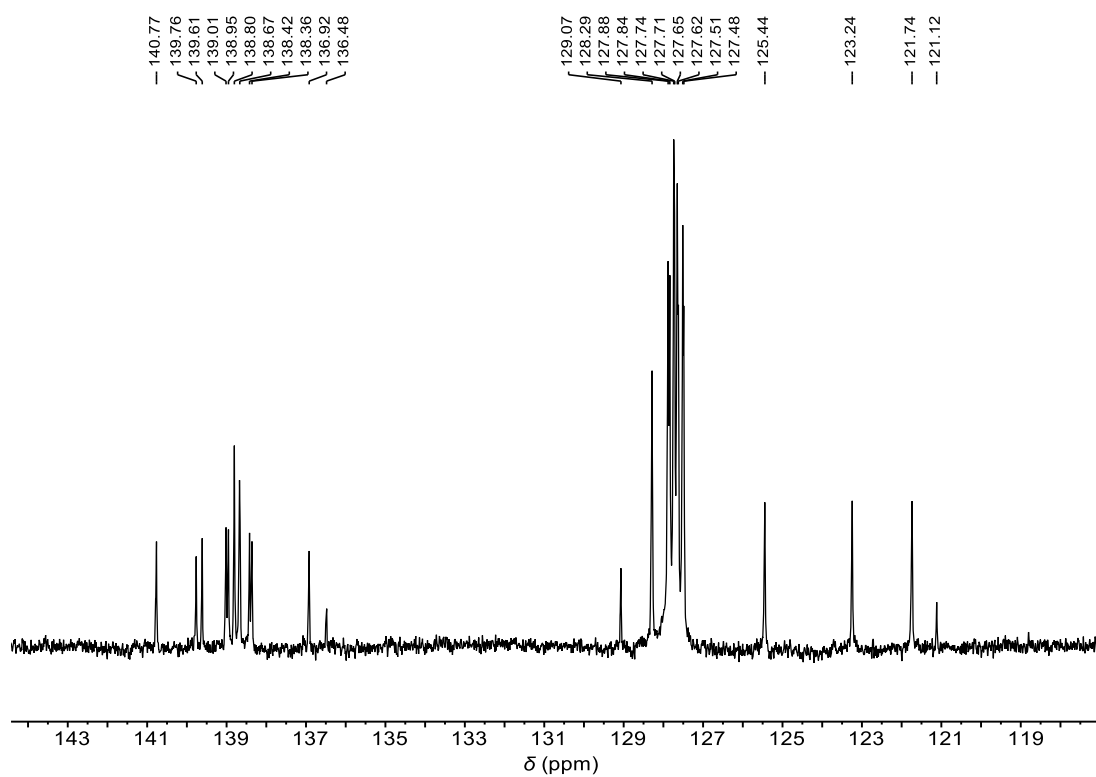

**Figure S6.**  $^{13}\text{C}$  NMR (126 MHz) of compound **DTF[11]CPP** in  $\text{CD}_2\text{Cl}_2$ ; selected region.

## 4. Electrochemistry

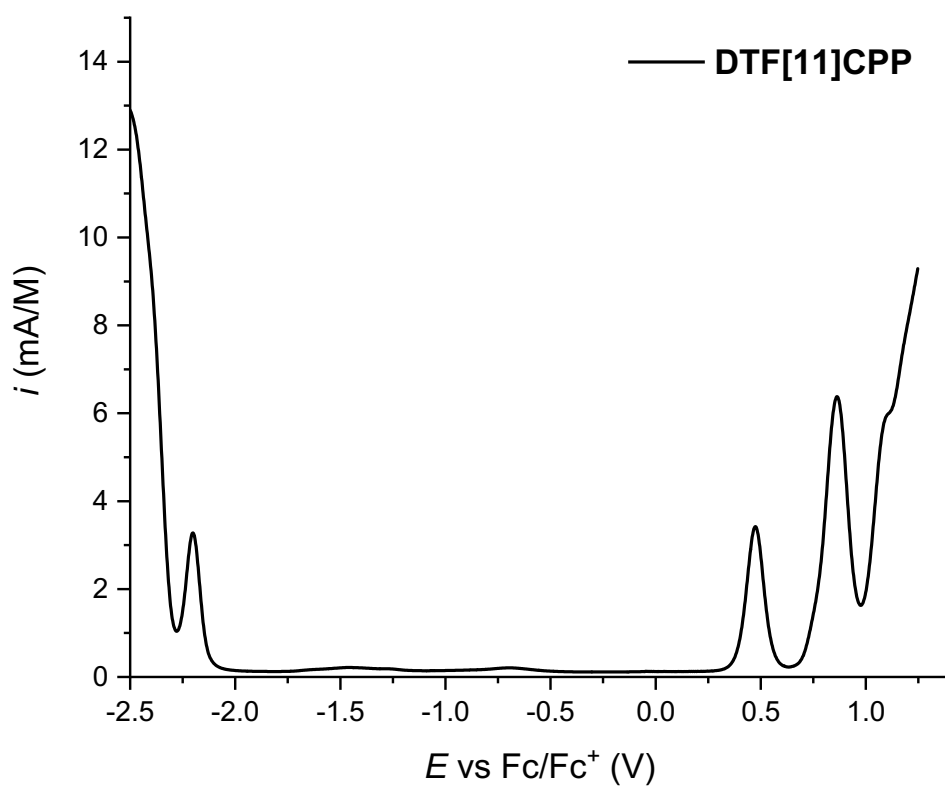

**Figure S7.** Differential pulse voltammogram of **DTF[11]CPP**. The voltammogram was recorded at 0.5 mM concentration in  $\text{CH}_2\text{Cl}_2$  using  $n\text{-Bu}_4\text{NPF}_6$  as the supporting electrolyte.

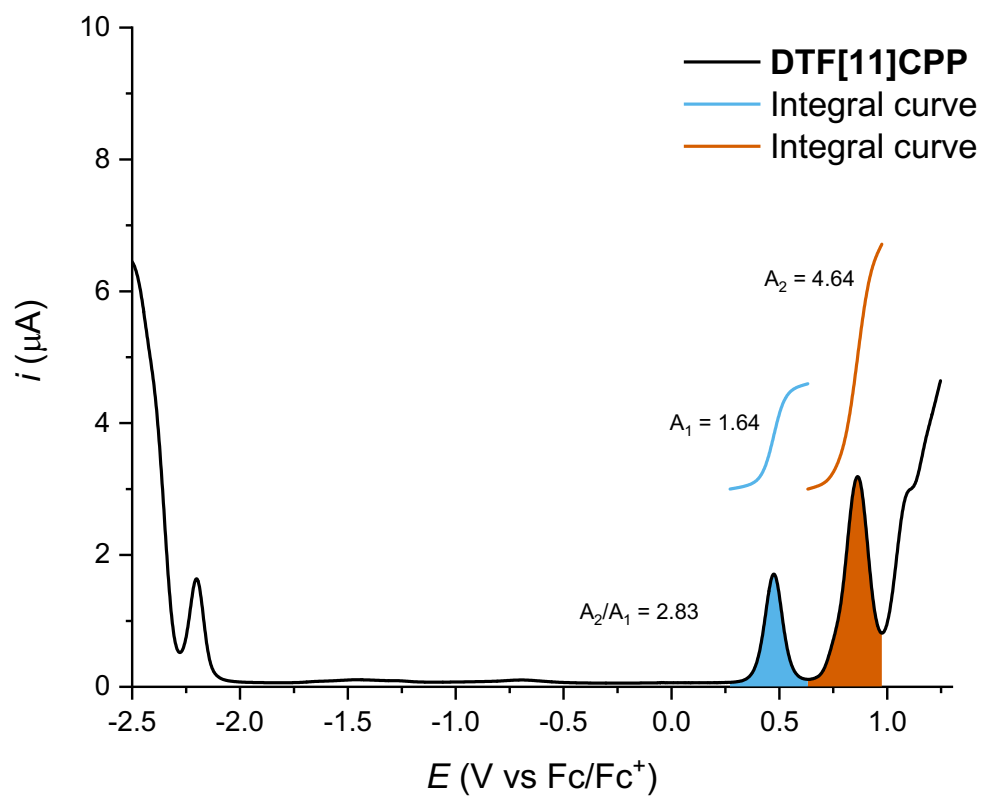

**Figure S8.** Differential pulse voltammogram of **DTF[11]CPP**. The voltammogram was recorded at 0.5 mM concentration in  $\text{CH}_2\text{Cl}_2$  using  $n\text{-Bu}_4\text{NPF}_6$  as the supporting electrolyte. Integral curves, integrals (a.u.), blue and orange, and integral ratio are shown.



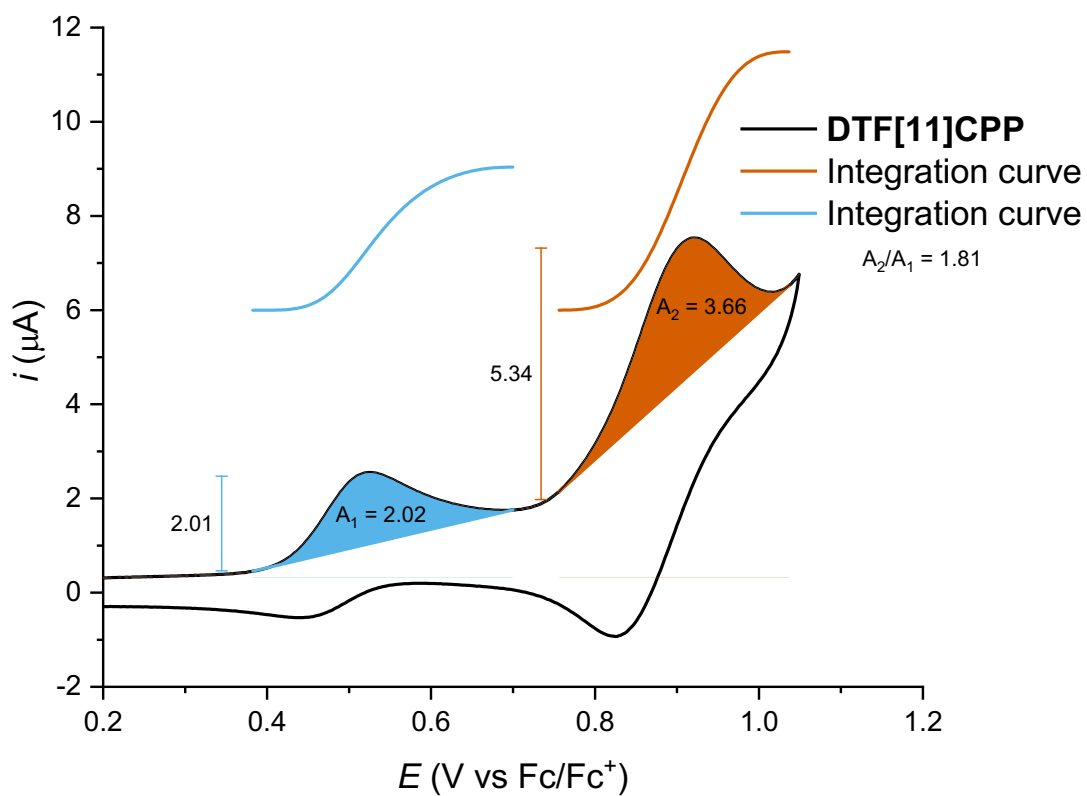

**Figure S9.** Cyclic voltammogram of **DTF[11]CPP**. The voltammogram was recorded at 0.5 mM concentration in  $\text{CH}_2\text{Cl}_2$  using  $n\text{-Bu}_4\text{NPF}_6$  as the supporting electrolyte at 0.1 V/s. Integral curves, integrals (a.u.), blue and orange, and integral ratio are shown.

## 5. HRMS Spectra

### Generic Display Report

#### Analysis Info

Analysis Name S:\fticr0\rod\analyser-routine\acq27383\_0\_A7\_000002.d  
Method 13109  
Sample Name DTF-CPP  
Comment

Acquisition Date 10/27/2025 1:28:02 PM

Operator  
Instrument solariX XR

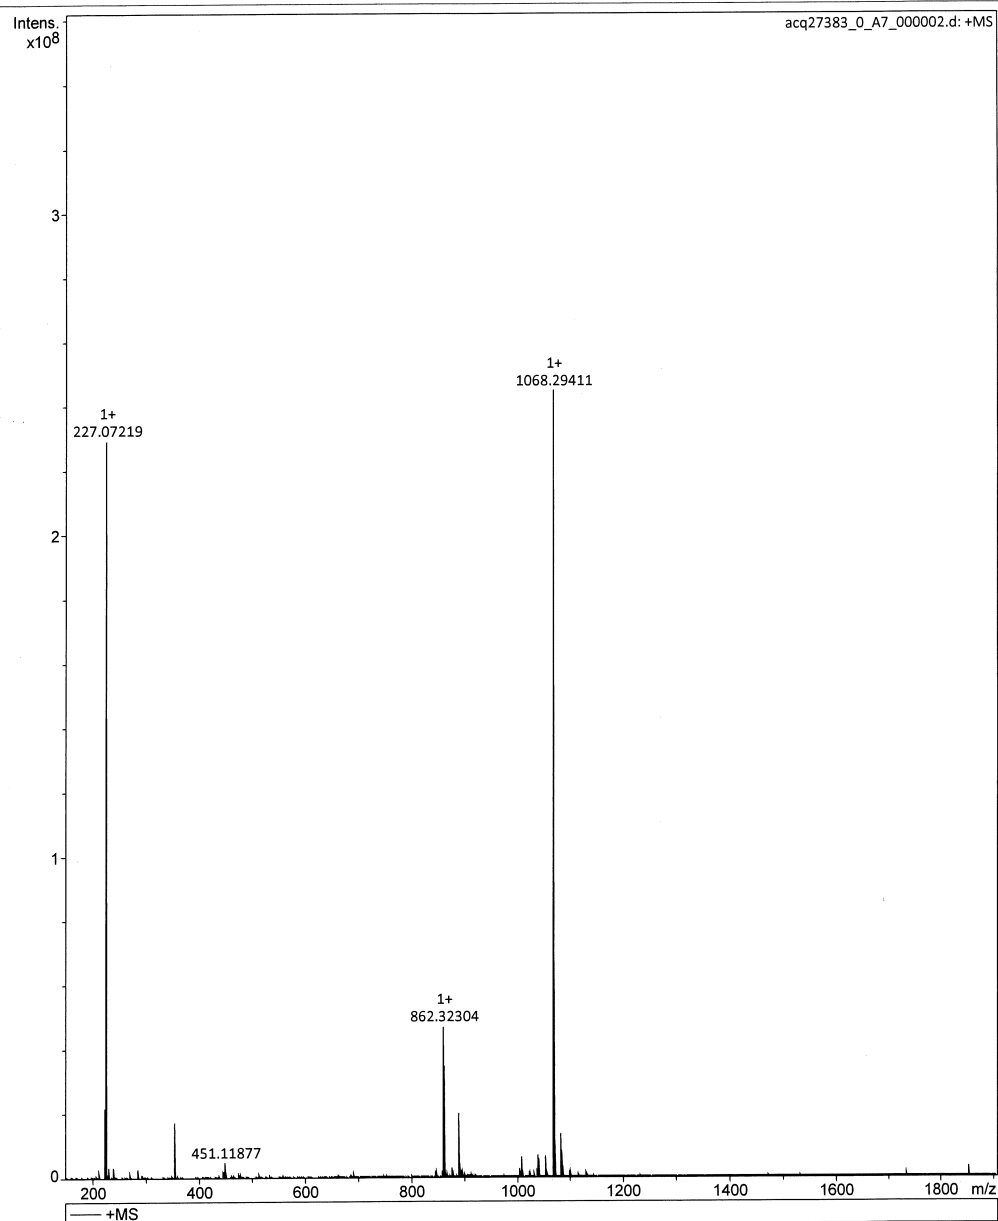

Figure S10. HRMS spectrum of compound **DTF[11]CPP**.

## Generic Display Report

### Analysis Info

Analysis Name S:\fticr0\rod\analyser-routine\acq27383\_0\_A7\_000002.d  
Method 13109  
Sample Name DTF-CPP  
Comment

Acquisition Date 10/27/2025 1:28:02 PM

Operator  
Instrument solariX XR

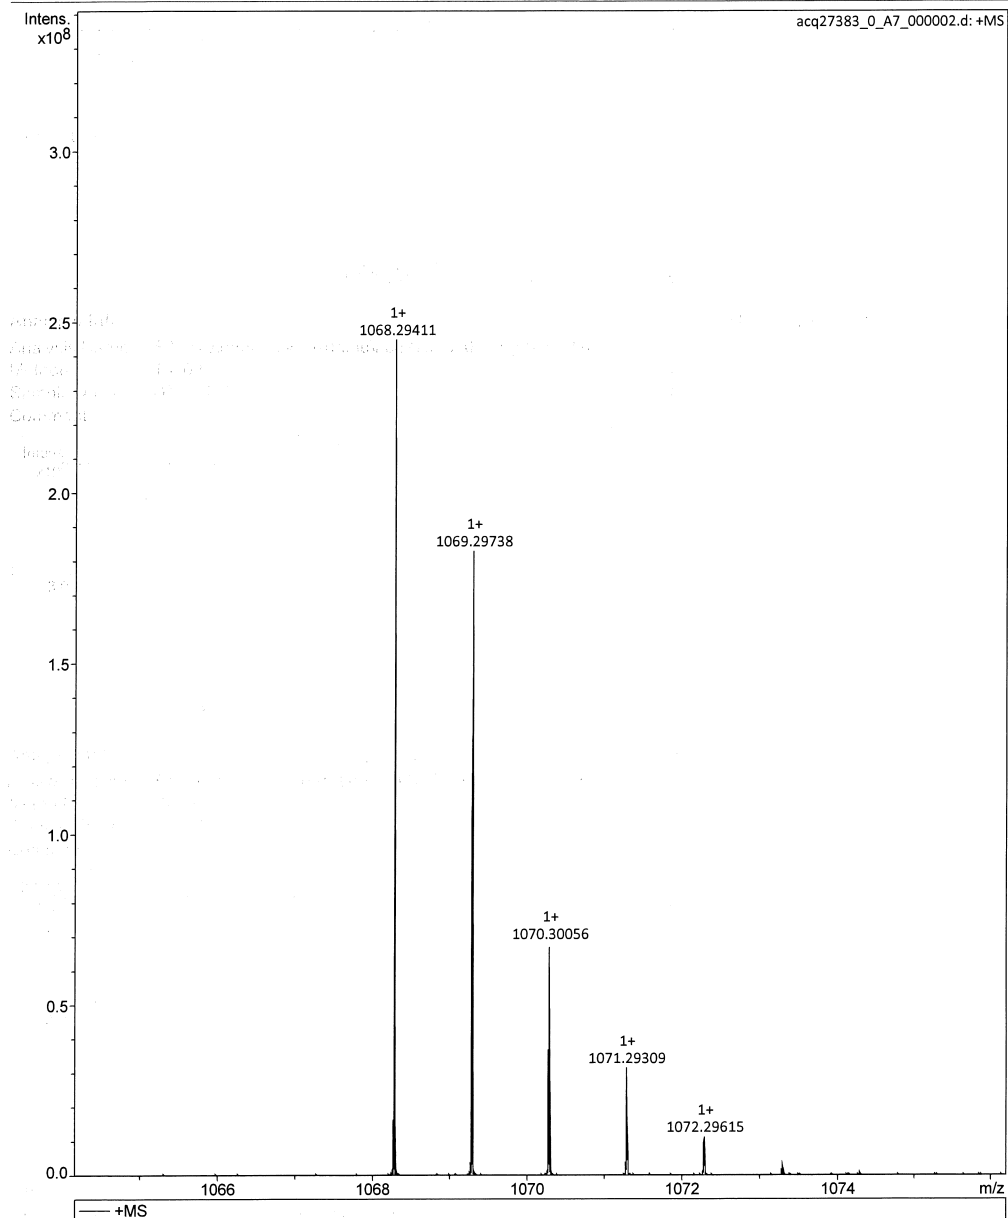

**Figure S11.** HRMS spectrum of compound **DTF[11]CPP**.

## 6. Computational

**Table S1.** The 20 calculated lowest energy transitions for **DTF[11]CPP**.

| Transition   | Energy (eV) | Energy (cm <sup>-1</sup> ) | Wavelength (nm) | fosc (D <sup>2</sup> ) | D <sup>2</sup> (au <sup>2</sup> ) | DX (au)  | DY (au)  | DZ (au)  |
|--------------|-------------|----------------------------|-----------------|------------------------|-----------------------------------|----------|----------|----------|
| 0-1A → 1-1A  | 3.393987    | 27374.4                    | 365.3           | 0.788590612            | 9.48382                           | 2.26798  | 0.09347  | 2.08118  |
| 0-1A → 2-1A  | 3.432373    | 27684.0                    | 361.2           | 0.399475925            | 4.75049                           | -0.05946 | 2.17777  | -0.06548 |
| 0-1A → 3-1A  | 3.774178    | 30440.8                    | 328.5           | 0.352765056            | 3.81509                           | -0.02674 | 1.95193  | -0.06588 |
| 0-1A → 4-1A  | 3.865014    | 31173.4                    | 320.8           | 2.027424030            | 21.41092                          | -4.40799 | 0.02298  | 1.40713  |
| 0-1A → 5-1A  | 3.923303    | 31643.6                    | 316.0           | 0.715166104            | 7.44041                           | 2.26720  | 0.23060  | -1.49901 |
| 0-1A → 6-1A  | 3.982100    | 32117.8                    | 311.4           | 1.658905378            | 17.00401                          | -0.11963 | 4.12093  | -0.08731 |
| 0-1A → 7-1A  | 4.060065    | 32746.6                    | 305.4           | 0.037192313            | 0.37391                           | 0.00323  | 0.50174  | 0.34950  |
| 0-1A → 8-1A  | 4.115978    | 33197.6                    | 301.2           | 0.029059547            | 0.28818                           | -0.22586 | -0.43621 | 0.21653  |
| 0-1A → 9-1A  | 4.360509    | 35169.9                    | 284.3           | 0.262885491            | 2.46077                           | 0.02016  | -1.56794 | 0.04389  |
| 0-1A → 10-1A | 4.476614    | 36106.3                    | 277.0           | 0.029828137            | 0.27197                           | 0.51971  | 0.03526  | 0.02504  |
| 0-1A → 11-1A | 4.626910    | 37318.6                    | 268.0           | 0.001903959            | 0.01680                           | -0.12818 | -0.01109 | -0.01562 |
| 0-1A → 12-1A | 4.638526    | 37412.2                    | 267.3           | 0.003309788            | 0.02912                           | 0.01042  | -0.17019 | 0.00712  |
| 0-1A → 13-1A | 4.671963    | 37681.9                    | 265.4           | 0.007659535            | 0.06692                           | 0.04838  | -0.13047 | 0.21807  |
| 0-1A → 14-1A | 4.740899    | 38237.9                    | 261.5           | 0.002534524            | 0.02182                           | 0.03773  | 0.01769  | 0.14172  |
| 0-1A → 15-1A | 4.771903    | 38488.0                    | 259.8           | 0.001460405            | 0.01249                           | -0.07355 | -0.01267 | 0.08320  |
| 0-1A → 16-1A | 4.795088    | 38675.0                    | 258.6           | 0.128999748            | 1.09808                           | -0.00541 | -1.04712 | 0.03988  |
| 0-1A → 17-1A | 4.802218    | 38732.5                    | 258.2           | 0.019919921            | 0.16931                           | 0.00087  | -0.41118 | 0.01550  |
| 0-1A → 18-1A | 4.843135    | 39062.5                    | 256.0           | 0.000106847            | 0.00090                           | 0.02737  | 0.01227  | 0.00095  |
| 0-1A → 19-1A | 4.845108    | 39078.4                    | 255.9           | 0.002944637            | 0.02481                           | -0.02634 | 0.15528  | -0.00158 |
| 0-1A → 20-1A | 4.899350    | 39515.9                    | 253.1           | 0.007598504            | 0.06330                           | -0.02266 | 0.00435  | -0.25054 |

**Table S2.** The 20 calculated lowest energy transitions for **DTF[11]CPP\*\***.

| Transition   | Energy (eV) | Energy (cm <sup>-1</sup> ) | Wavelength (nm) | fosc (D <sup>2</sup> ) | D <sup>2</sup> (au <sup>2</sup> ) | DX (au)  | DY (au)  | DZ (au)  |
|--------------|-------------|----------------------------|-----------------|------------------------|-----------------------------------|----------|----------|----------|
| 0-2A → 1-2A  | 1.038123    | 8373.0                     | 1194.3          | 0.000112660            | 0.00443                           | 0.02898  | -0.05791 | 0.01535  |
| 0-2A → 2-2A  | 1.734681    | 13991.1                    | 714.7           | 0.229531319            | 5.40088                           | 1.37167  | -0.15676 | 1.86944  |
| 0-2A → 3-2A  | 2.041929    | 16469.3                    | 607.2           | 0.001432799            | 0.02864                           | -0.07765 | -0.02661 | 0.14800  |
| 0-2A → 4-2A  | 2.173862    | 17533.4                    | 570.3           | 0.005799763            | 0.10890                           | 0.03381  | 0.32494  | 0.04656  |
| 0-2A → 5-4A  | 2.339179    | 18866.8                    | 530.0           | 0.018724078            | 0.32672                           | 0.01188  | 0.57145  | 0.00500  |
| 0-2A → 6-2A  | 2.446981    | 19736.2                    | 506.7           | 0.008572890            | 0.14300                           | 0.14763  | 0.31777  | 0.14224  |
| 0-2A → 7-4A  | 2.453494    | 19788.8                    | 505.3           | 0.010008143            | 0.16650                           | 0.01335  | -0.40706 | -0.02502 |
| 0-2A → 8-4A  | 2.532147    | 20423.1                    | 489.6           | 0.010545665            | 0.16999                           | 0.08303  | -0.39074 | 0.10206  |
| 0-2A → 9-4A  | 2.577084    | 20785.6                    | 481.1           | 0.015996794            | 0.25336                           | -0.14463 | -0.43888 | -0.19957 |
| 0-2A → 10-2A | 2.742932    | 22123.2                    | 452.0           | 0.038229766            | 0.56889                           | -0.53568 | -0.00266 | -0.53097 |
| 0-2A → 11-2A | 2.810816    | 22670.8                    | 441.1           | 0.098257129            | 1.42683                           | -0.72243 | -0.11166 | -0.94470 |
| 0-2A → 12-4A | 2.830798    | 22831.9                    | 438.0           | 0.026537146            | 0.38264                           | -0.40148 | 0.02847  | -0.46972 |
| 0-2A → 13-2A | 2.887404    | 23288.5                    | 429.4           | 0.017650603            | 0.24951                           | 0.27256  | 0.26341  | 0.32533  |
| 0-2A → 14-4A | 2.974596    | 23991.7                    | 416.8           | 0.065007381            | 0.89202                           | 0.64451  | -0.04193 | 0.68911  |
| 0-2A → 15-2A | 3.026089    | 24407.1                    | 409.7           | 0.179619898            | 2.42278                           | 1.04127  | -0.33683 | 1.10684  |
| 0-2A → 16-4A | 3.200491    | 25813.7                    | 387.4           | 0.042497247            | 0.54198                           | -0.01296 | -0.73264 | 0.07106  |
| 0-2A → 17-4A | 3.300161    | 26617.6                    | 375.7           | 0.017937662            | 0.22186                           | -0.33750 | -0.11611 | -0.30735 |
| 0-2A → 18-2A | 3.348557    | 27007.9                    | 370.3           | 0.031295354            | 0.38147                           | 0.07330  | 0.61321  | 0.00821  |
| 0-2A → 19-2A | 3.371030    | 27189.2                    | 367.8           | 0.036124152            | 0.43740                           | 0.18919  | 0.62011  | 0.13066  |
| 0-2A → 20-2A | 3.381817    | 27276.2                    | 366.6           | 0.061247537            | 0.73923                           | 0.02151  | 0.84093  | -0.17776 |

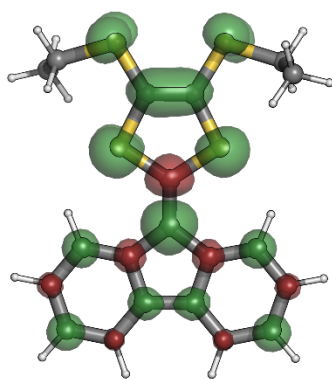

**Figure S12.** Spin density distribution of **F-DTF**<sup>•+</sup> in dichloromethane, calculated using CAM-B3LYP/pcJ-1 using C-PCM. Color code: positive spin density (green), negative spin density (red). Isosurface levels set at 0.002.

## 7. ESR spectrum of F-DTF

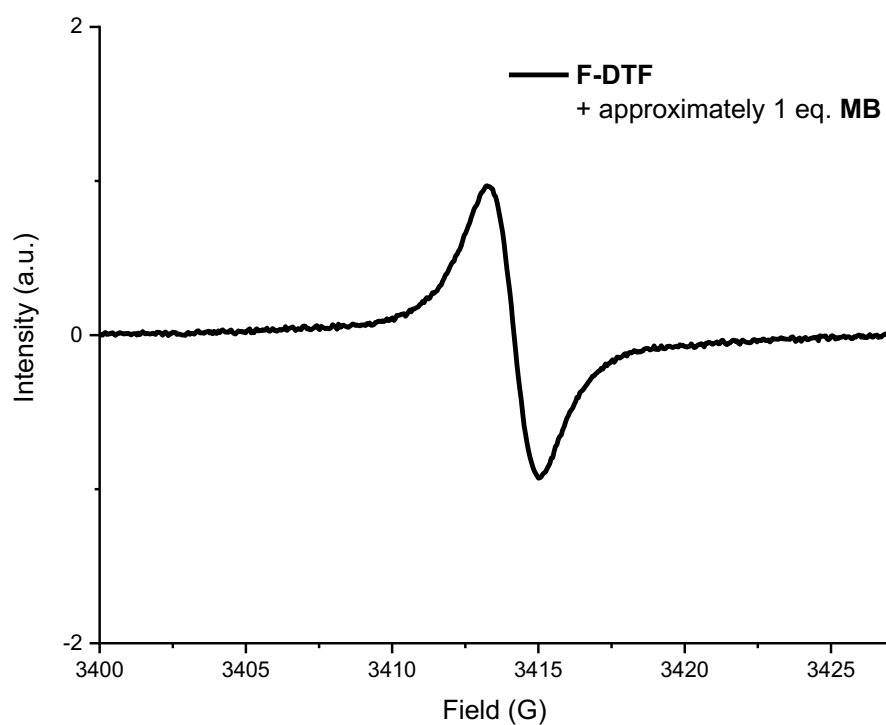

**Figure S13.** ESR spectrum of **F-DTF** treated with 'magic blue' (**MB**, tris(4-bromophenyl)ammoniumyl hexachloroantimonate) in  $\text{CD}_2\text{Cl}_2$ .

## 8. References

1. V. Bliksted Roug Pedersen, T. W. Price, N. Kofod, L. N. Zakharov, B. W. Laursen, R. Jasti and M. B. Nielsen, *Chem. Eur. J.*, 2024, **30**, e202303490.
